# Supplementary material for: Consequences of nongenomic actions of estradiol on pathogenic genital tract response
Source: PubMed Central journal article supplement (PMC3570385; doi:10.1186/1750-2187-8-1), 2013-01-26
Supplement: 1750-2187-8-1-S1.pdf [file 1750-2187-8-1-S1.pdf]

Additional file 1. Rapid effects of estradiol in target tissues.

| Physiological action                                                                                                         | Cell | Tissue/organism                   | Signaling pathway                                                                | Reference                | Criteria of non genomic action |
|------------------------------------------------------------------------------------------------------------------------------|------|-----------------------------------|----------------------------------------------------------------------------------|--------------------------|--------------------------------|
| Unregistered                                                                                                                 |      | Pig granulosa cells               | Mobilization of ion calcium Ca <sup>2+</sup> triggered by inositol trisphosphate | Morley et al., 1992      | ii                             |
| 17 beta-estradiol was found to reduce Ba <sup>2+</sup> entry reversibly via Ca <sup>2+</sup> channels in acutely dissociated |      | Neostriatal neurons               | G-protein activation                                                             | Mermelstein et al., 1996 | i, iv                          |
| Increase in extracellular-regulated kinase (ERK) activity within 10 min                                                      |      | Chinese hamster ovary (CHO) cells | Phosphoinositide cascade and adenylate cyclase                                   | Razandi et al., 1999     | i                              |
| Nongenomic action of estrogen                                                                                                |      | Human SKBR3 breast cancer cells   | Mediated by a G protein-coupled receptor<br>Phosphorylation of ERK-1/-2          | Filardo et al., 2000     | i, ii, v                       |
| Suppression of tumor necrosis factor alpha-induced apoptosis                                                                 |      | MCF-7 cells                       | Increase in Bcl-2 expression                                                     | Burow et al., 2001       | V                              |
| Suppress the                                                                                                                 |      | Human metastatic                  | Reduced the constitutive                                                         | Kanda et al., 2001       | V                              |

---

|                                                                                                                 |                                                   |                                                                                                 |                      |          |
|-----------------------------------------------------------------------------------------------------------------|---------------------------------------------------|-------------------------------------------------------------------------------------------------|----------------------|----------|
| growth of melanoma                                                                                              | melanoma                                          | interleukin-8 secretion and mRNA levels                                                         |                      |          |
| Unrecorded                                                                                                      | Mouse IC-21 macrophages                           | Increased intracellular free Ca <sup>2+</sup> concentration ([Ca <sup>2+</sup> ] <sub>i</sub> ) | Peter et al., 2001   | i, iv, v |
| Increase in the frequency of glucose-induced [Ca <sup>2+</sup> ] <sub>i</sub> oscillations in insulin-releasing | β-cells within the pancreatic islet of Langerhans | Increased intracellular calcium concentration ([Ca <sup>2+</sup> ] <sub>i</sub> )               | Ropero et al., 2002  | i, iv, v |
| Stimulation of cAMP production                                                                                  | Human SKBR3 breast cancer cells                   | Via GPR30 to stimulate adenylyate cyclase                                                       | Filardo et al., 2002 | i, v     |
| Formation of membrane ruffles and pseudopodia                                                                   | MCF-7 cells                                       | Shc phosphorylation, presumably by a Src protein family member, phosphorylation of ERK-1/-2     | Song et al., 2002    | i, v     |
| E2-induced ERbeta up-regulation                                                                                 | DLD-1 colon cancer cells                          | E2-induced persistent and palmitoylation-dependent p38/MAPK activation                          | Caiazza et al., 2007 | i        |
| Improves macrophages cytokine production                                                                        | Splenic macrophages of Male Sprague-Dawley rats   | MAPK pathways                                                                                   | Suzuki et al., 2008  | iv       |

---

---

|                                                                                                           |                                               |                                                             |                       |           |
|-----------------------------------------------------------------------------------------------------------|-----------------------------------------------|-------------------------------------------------------------|-----------------------|-----------|
| Inhibition of colonic contractility                                                                       | Circular smooth muscle strips of human colon. | Mechanism involving cell membrane coupling                  | Hogan et al., 2009    | i, ii, iv |
| Inhibits osteoclastic differentiation and the interaction of estrogen receptor-alpha with BCAR1 and Traf6 | Human monocytes                               | RANKL-stimulated                                            | Robinson et al., 2009 | I         |
| Induces an antimitogenic effect                                                                           | Lactotroph cells                              | Estradiol interacts with insulin through membrane receptors | Gutierrez et al.,     | Iv        |

---
